# Supplementary material for: Preclinical efficacy for a novel tyrosine kinase inhibitor, ArQule 531 against acute myeloid leukemia
Source: Springer Nature journal article supplement (doi:10.1186/s13045-019-0821-7), 2020-01-28
Supplement: MOESM1 [file 17603202]

**Supplementary Table S4.** ARQ 531 and Gilteritinib efficacy in primary patient's samples

| <b>ARQ 531</b>                       |                        |               |                |
|--------------------------------------|------------------------|---------------|----------------|
| <b>Concentration (µM) Comparison</b> | <b>Estimated Ratio</b> | <b>95% CI</b> | <b>P-value</b> |
| 0.005 Versus Vehicle                 | 0.91                   | (0.79, 1.05)  | 0.438          |
| 0.01 Versus Vehicle                  | 0.95                   | (0.82, 1.1)   | 0.936          |
| 0.05 Versus Vehicle                  | 0.92                   | (0.79, 1.06)  | 0.489          |
| 0.1 Versus Vehicle                   | 0.9                    | (0.78, 1.04)  | 0.259          |
| 0.5 Versus Vehicle                   | 0.69                   | (0.6, 0.8)    | <.001          |
| 1 Versus Vehicle                     | 0.58                   | (0.5, 0.68)   | <.001          |
| 5 Versus Vehicle                     | 0.34                   | (0.25, 0.48)  | <.001          |
| 10 Versus Vehicle                    | 0.28                   | (0.15, 0.52)  | <.001          |
| 50 Versus Vehicle                    | 0.09                   | (0, 2.04)     | 0.158          |
| <b>Gilteritinib</b>                  |                        |               |                |
| <b>Concentration (µM) Comparison</b> | <b>Estimated Ratio</b> | <b>95% CI</b> | <b>P-value</b> |
| 0.005 vs. 0 (DMSO)                   | 1.02                   | (0.89, 1.17)  | >.999          |
| 0.01 vs. 0                           | 1.05                   | (0.92, 1.21)  | 0.926          |
| 0.05 vs. 0                           | 1.06                   | (0.92, 1.21)  | 0.889          |
| 0.1 vs. 0                            | 1.02                   | (0.89, 1.17)  | >.999          |
| 0.5 vs. 0                            | 0.99                   | (0.86, 1.13)  | >.999          |
| 1 vs. 0                              | 0.87                   | (0.76, 1)     | 0.05           |
| 5 vs. 0                              | 0.78                   | (0.67, 0.9)   | <.001          |
| 10 vs. 0                             | 0.56                   | (0.47, 0.66)  | <.001          |
| 50 vs. 0                             | 0.54                   | (0.3, 0.98)   | 0.041          |
