# Supplementary material for: Preclinical efficacy for a novel tyrosine kinase inhibitor, ArQule 531 against acute myeloid leukemia
Source: Springer Nature journal article supplement (doi:10.1186/s13045-019-0821-7), 2020-01-28
Supplement: MOESM2 [file 17603202]

**Supplementary Table S1.** Estimated absolute IC<sub>50</sub> based on a 4-parameter logistic model.

| <b>Cell Line</b> | <b>Estimated absolute<br/>μM IC<sub>50</sub> (95% CI)</b> | <b>Mutations</b>                     |
|------------------|-----------------------------------------------------------|--------------------------------------|
| MOLM-13          | 0.69 (0.59, 0.79)                                         | NF1, FLT3, BIRC6, CBL                |
| MV4-11           | 1.45 (1.04, 1.85)                                         | TP53, FLT3                           |
| OCI-AML3         | 1.51 (0.60, 2.43)                                         | SPI1, DNMT3A, NPM1, NRAS             |
| THP-1            | Unable to calculate IC <sub>50</sub>                      | TP73, NRAS, SMARCA2                  |
| U937             | Unable to calculate IC <sub>50</sub>                      | ETV6, JAK3, MED12, PTEN, PTPN11, WT1 |
