# Supplementary material for: Preclinical efficacy for a novel tyrosine kinase inhibitor, ArQule 531 against acute myeloid leukemia
Source: Springer Nature journal article supplement (doi:10.1186/s13045-019-0821-7), 2020-01-28
Supplement: MOESM3 [file 17603202]

**Supplementary Table S2.** Estimated absolute IC<sub>50</sub> based on a 4-parameter logistic model.

| <b>Cell line/Mutation</b> | <b>Estimated absolute <math>\mu\text{M}</math> IC<sub>50</sub> and 95% CI</b> |
|---------------------------|-------------------------------------------------------------------------------|
| MOLM13                    | 1.33 (1.26, 1.41)                                                             |
| MOLM13-Res                | 3.42 (3.25, 3.58)                                                             |
| Ba/F3 GFP+IL3             | Unable to calculate IC <sub>50</sub>                                          |
| Ba/F3 FLT3-ITD            | 1.21 (1.16, 1.26)                                                             |
| Ba/F3 FLT3-D835H          | 1.74 (1.64, 1.85)                                                             |
| Ba/F3 FLT3-D835Y          | 6.11 (5.39, 6.83)                                                             |
| Ba/F3 FLT3-ITD/D835H      | 3.76 (3.5, 4.03)                                                              |
| Ba/F3 FLT3-ITD/D835Y      | 7.55 (6.99, 8.12)                                                             |
| Ba/F3 FLT3-ITD/F691L      | 7.12 (6.44, 7.81)                                                             |
