# Supplementary material for: Preclinical efficacy for a novel tyrosine kinase inhibitor, ArQule 531 against acute myeloid leukemia
Source: Springer Nature journal article supplement (doi:10.1186/s13045-019-0821-7), 2020-01-28
Supplement: MOESM4 [file 17603202]

**Supplementary Table S3.** Primary patient samples information

| <b>Sample ID</b> | <b>Sample Type</b> | <b>FLT3 Status</b> | <b>Additional Mutations</b>       |
|------------------|--------------------|--------------------|-----------------------------------|
| U-11-1271        | Bone Marrow        | WT                 |                                   |
| U-11-1363        | Bone Marrow        | WT                 |                                   |
| U-12-1567        | Bone Marrow        | WT                 |                                   |
| U-14-1077        | Apheresis          | WT                 | BRINP3, NPM1                      |
| U-15-0251        | Apheresis          | WT                 |                                   |
| U-15-2962        | Apheresis          | WT                 | FLT3, BCOR                        |
| U-07-0614        | Bone Marrow        | ITD                |                                   |
| U-09-1270        | Bone Marrow        | ITD                |                                   |
| U-09-1409        | Bone Marrow        | ITD                |                                   |
| U-10-0874        | Bone Marrow        | ITD                |                                   |
| U-14-2181        | Apheresis          | ITD                | FLT3, NPM1, RAD21, TET2           |
| U-15-3590        | Apheresis          | ITD                | BCORL1, TET2, NPM1, KMT2A, DNMT3A |
| AML1             | Apheresis          | WT                 | NRAS, WT1                         |
