# Supplementary material for: Preclinical efficacy for a novel tyrosine kinase inhibitor, ArQule 531 against acute myeloid leukemia
Source: Springer Nature journal article supplement (doi:10.1186/s13045-019-0821-7), 2020-01-28

**Supplementary Figure S2.** Immunoblot analysis for MOLM-13 FLT3-ITD cell line treated for 1 hour with 1  $\mu$ M of ARQ 531 multi-kinase inhibitor, ibrutinib irreversible BTK inhibitor, and entospletinib SYK inhibitor **(A)**. 72 hours MTS proliferation assay using MOLM-13 cell line treated with 1  $\mu$ M of ARQ 531, ibrutinib (1 hour washout), or entospletinib **(B)**.

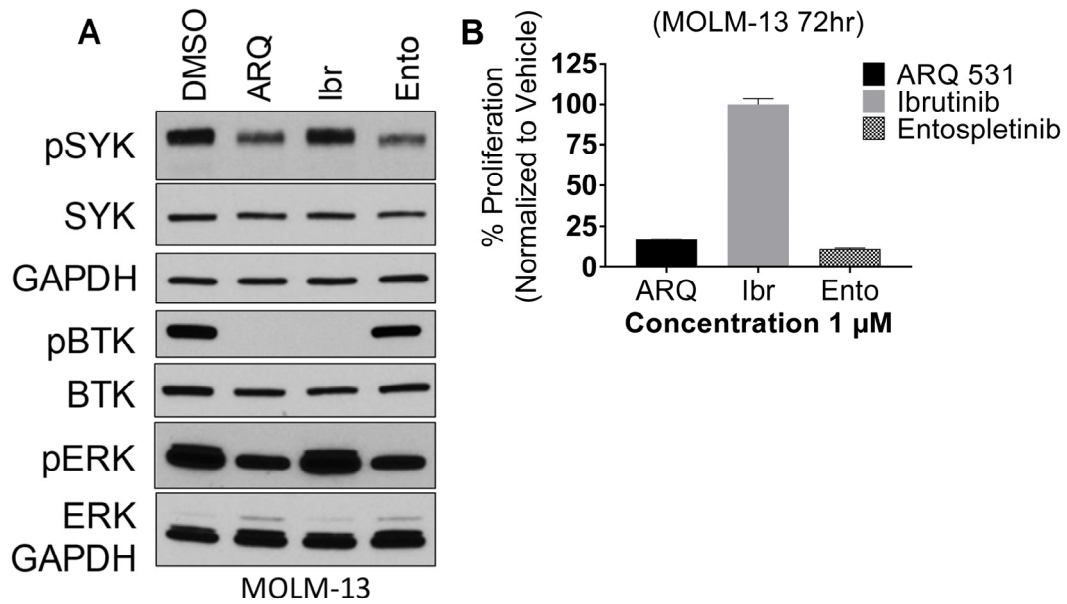

Supplement: MOESM6 [file 17603202]
