# Supplementary material for: Preclinical efficacy for a novel tyrosine kinase inhibitor, ArQule 531 against acute myeloid leukemia
Source: Springer Nature journal article supplement (doi:10.1186/s13045-019-0821-7), 2020-01-28
Supplement: MOESM7 [file 17603202]

**Supplementary Table S6.** Estimated IC<sub>50</sub> calculations in SYK overexpressing cell lines

| <b>Drug</b>         | <b>Cell Line</b>            | <b>Experiment 1</b> | <b>Experiment 2</b> | <b>Overall</b>   |
|---------------------|-----------------------------|---------------------|---------------------|------------------|
| <b>ARQ-531</b>      | Ba/F3 FLT3-ITD Parental     | 2.71                | 2.53                | 2.71             |
|                     |                             | (2.6, 2.83)         | (1.71, 3.34)        | (2.6, 2.82)      |
|                     | Ba/F3 FLT3-ITD pMIT-Empty   | 4.24                | 2.7                 | 3.48             |
|                     |                             | (4.07, 4.42)        | (2.53, 2.88)        | (3.35, 3.6)      |
|                     | Ba/F3 FLT3-ITD pMIT SYK-TEL | 11.02               | 5.94                | 6.61             |
|                     |                             | (10.13, 11.91)      | (5.6, 6.29)         | (6.29, 6.92)     |
| <b>Gilteritinib</b> | Ba/F3 FLT3-ITD Parental     | 20.46               | 9.49                | 16.81            |
|                     |                             | (19.54, 21.37)      | (8.19, 10.78)       | (16.08, 17.55)   |
|                     | Ba/F3 FLT3-ITD pMIT-Empty   | 47.17               | 15.11               | 24.56            |
|                     |                             | (45.39, 48.94)      | (13.97, 16.26)      | (23.61, 25.51)   |
|                     | Ba/F3 FLT3-ITD pMIT SYK-TEL | 650.55              | 415.42              | 456.48           |
|                     |                             | (572.74, 728.37)    | (379.62, 451.21)    | (424.51, 488.46) |
| <b>Midostaurin</b>  | Ba/F3 FLT3-ITD Parental     | 95.38               | 63.32               | 76.25            |
|                     |                             | (91.73, 99.03)      | (60.32, 66.32)      | (73.97, 78.53)   |
|                     | Ba/F3 FLT3-ITD pMIT-Empty   | 197.95              | 95.32               | 96.29            |
|                     |                             | (162.87, 233.02)    | (91.9, 98.74)       | (92.94, 99.64)   |
|                     | Ba/F3 FLT3-ITD pMIT SYK-TEL | 403.64              | 229.56              | 280.84           |
|                     |                             | (378.92, 428.37)    | (213.58, 245.54)    | (267.64, 294.03) |
