# Supplementary material for: Preclinical efficacy for a novel tyrosine kinase inhibitor, ArQule 531 against acute myeloid leukemia
Source: Springer Nature journal article supplement (doi:10.1186/s13045-019-0821-7), 2020-01-28
Supplement: MOESM9 [file 17603202]

**Supplementary Table S7.** ARQ 531 *in vivo* activity in MOLM-13 disseminated AML xenograft model.

| ARQ 531 Monotherapy                  |            |           |        |                                       |          |
|--------------------------------------|------------|-----------|--------|---------------------------------------|----------|
| Group                                | N original | N engraft | N died | Estimated Median Survival Time (Days) | 95% CI   |
| Vehicle                              | 7          | 7         | 7      | 21                                    | (20, 21) |
| ARQ 531                              | 8          | 8         | 8      | 23                                    | (21, 24) |
| Log-rank p-value = 0.002             |            |           |        |                                       |          |
| ARQ 531 + Venetoclax Combination     |            |           |        |                                       |          |
| Group                                | N original | N engraft | N died | Estimated median survival time (days) | 95% CI   |
| Vehicle                              | 10         | 9         | 9      | 25                                    | (24, 26) |
| ARQ 531                              | 10         | 9         | 9      | 27                                    | (24, 30) |
| Venetoclax                           | 10         | 10        | 10     | 24                                    | (22, 25) |
| ARQ 531 + Venetoclax                 | 10         | 10        | 10     | 29                                    | (28, 32) |
| Overall log-rank test p-value <0.001 |            |           |        |                                       |          |
