# Supplementary material for: Preclinical efficacy for a novel tyrosine kinase inhibitor, ArQule 531 against acute myeloid leukemia
Source: Springer Nature journal article supplement (doi:10.1186/s13045-019-0821-7), 2020-01-28

**Supplementary Figure S3.** Mice were injected with 150 mg/kg Firefly D-Luciferin for the evaluation of dorsal view tumor burden as determined by whole body bioluminescence imaging using IVIS imager.

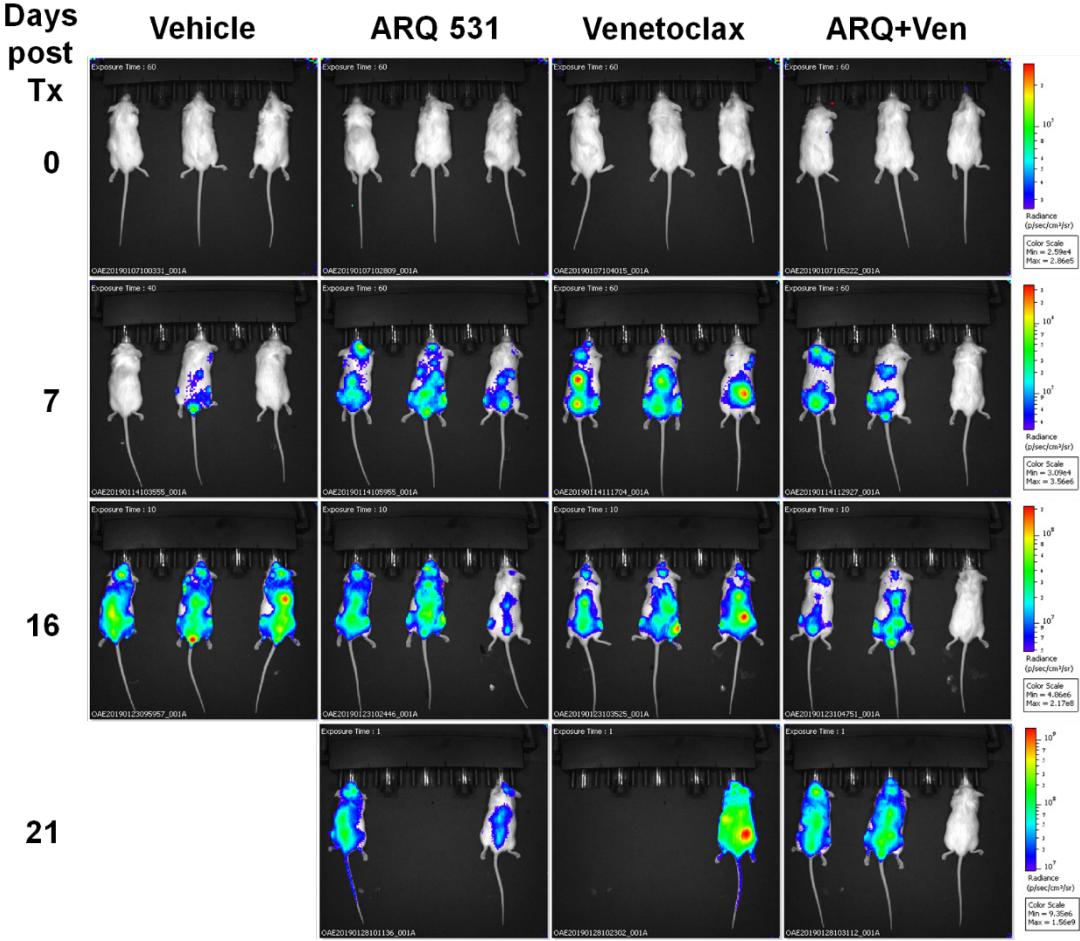

Supplement: MOESM10 [file 17603202]
